# Supplementary material for: Characterization of internalin genes in Listeria monocytogenes from food and humans, and their association with the invasion of Caco-2 cells
Source: Gut Pathog. 2019 Jun 10;11:30. doi: 10.1186/s13099-019-0307-8 (PMC6558679; doi:10.1186/s13099-019-0307-8)
Supplement: Supplementary file 1 — Additional file 1: Table S1. Characterization of specific alleles in InlA of 120 Listeria monocytogenes isolates. [file 13099_2019_307_MOESM1_ESM.xlsx]

## Sheet: Sheet1
ADDITIONAL DATA
Table S1
Characterization of specific alleles in InlA of 120 Listeria monocytogenes isolates
Strain	Source	Serotype	Lineage	Year	InlA phenotype (Mutation type)
SHL12-4	Chicken	1/2a,3a	lineageⅡ	2012	FL
SHL12-5	Duck	1/2a,3a	lineageⅡ	2012	FL
SHL12-11	Chicken	1/2a,3a	lineageⅡ	2012	FL
SHL12-13	Duck	1/2a,3a	lineageⅡ	2012	FL
SHL12-14	Duck	1/2a,3a	lineageⅡ	2012	FL
SHL12-15	Duck	1/2a,3a	lineageⅡ	2012	FL
SHL12-16	Pork	1/2a,3a	lineageⅡ	2012	FL
SHL12-20	Beef	1/2a,3a	lineageⅡ	2012	FL
SHL12-21	Beef	1/2a,3a	lineageⅡ	2012	FL
SHL12-22	Duck	1/2a,3a	lineageⅡ	2012	Mutation type 4 (aa 9)
SHL12-26	Beef	1/2a,3a	lineageⅡ	2012	FL
SHL12-27	Duck	1/2a,3a	lineageⅡ	2012	Mutation type 6 (aa 492)
SHL12-31	Beef	1/2a,3a	lineageⅡ	2012	FL
SHL12-34	Duck	1/2a,3a	lineageⅡ	2012	Mutation type 6 (aa 492)
SHL12-35	Duck	1/2a,3a	lineageⅡ	2012	FL
SHL12-37	Beef	1/2a,3a	lineageⅡ	2012	FL
SHL12-38	Chicken	1/2a,3a	lineageⅡ	2012	FL
SHL12-40	Pork	1/2a,3a	lineageⅡ	2012	FL
SHL12-45	Duck	1/2a,3a	lineageⅡ	2012	FL
SHL12-46	Beef	1/2a,3a	lineageⅡ	2012	Mutation type 4 (aa 9)
SHL12-50	Pork	1/2a,3a	lineageⅡ	2012	FL
SHL12-51	Beef	1/2a,3a	lineageⅡ	2012	FL
SHL12-52	Beef	1/2a,3a	lineageⅡ	2012	FL
SHL12-53	Chicken	1/2a,3a	lineageⅡ	2012	FL
SHL12-54	Duck	1/2a,3a	lineageⅡ	2012	FL
SHL12-58	Beef	1/2a,3a	lineageⅡ	2012	FL
SHL12-63	Duck	1/2a,3a	lineageⅡ	2012	Mutation type 6 (aa 492)
SHL12-65	Beef	1/2a,3a	lineageⅡ	2012	FL
SHL12-69	Duck	1/2a,3a	lineageⅡ	2012	FL
SHL13-12	Duck	1/2a,3a	lineageⅡ	2013	Mutation type 6 (aa 492)
SHL13-14	Beef	1/2a,3a	lineageⅡ	2013	Mutation type 6 (aa 492)
SHL13-15	Chicken	1/2a,3a	lineageⅡ	2013	FL
SHL13-19	Beef	1/2a,3a	lineageⅡ	2013	FL
SHL13-28	Duck	1/2a,3a	lineageⅡ	2013	FL
SHL13-30	Beef	1/2a,3a	lineageⅡ	2013	FL
SHL13-38	Dairy	1/2a,3a	lineageⅡ	2013	FL
SHL001	Human(CSF)	1/2a	lineageⅡ	2007	FL
SHL004	Human(blood)	1/2a	lineageⅡ	2008	FL
SHL005	Human(blood)	1/2a	lineageⅡ	2008	FL
SHL009	Human(blood)	1/2a	lineageⅡ	2012	FL
SHL011	Human(blood)	1/2a	lineageⅡ	2011	FL
SHL013	Human(blood)	1/2a	lineageⅡ	2012	3-codon deletion (aa741-743)
LM438	Beef	1/2a,3a	lineageⅡ	2008	FL
LM469	Bean	1/2a,3a	lineageⅡ	2004	FL
SHL12-6	Pork	1/2b,3b,7	lineageⅠ	2012	FL
SHL12-12	Chicken	1/2b,3b,7	lineageⅠ	2012	FL
SHL12-29	Chicken	1/2b,3b,7	lineageⅠ	2012	FL
SHL12-41	Chicken	1/2b,3b,7	lineageⅠ	2012	FL
SHL12-42	Chicken	1/2b,3b,7	lineageⅠ	2012	FL
SHL12-43	Chicken	1/2b,3b,7	lineageⅠ	2012	FL
SHL12-44	Duck	1/2b,3b,7	lineageⅠ	2012	FL
SHL12-49	Pork	1/2b,3b,7	lineageⅠ	2012	FL
SHL12-61	Chicken	1/2b,3b,7	lineageⅠ	2012	FL
SHL13-1	Chicken	1/2b,3b,7	lineageⅠ	2013	FL
SHL13-2	Chicken	1/2b,3b,7	lineageⅠ	2013	FL
SHL13-3	Duck	1/2b,3b,7	lineageⅠ	2013	FL
SHL13-7	Chicken	1/2b,3b,7	lineageⅠ	2013	FL
SHL13-18	Beef	1/2b,3b,7	lineageⅠ	2013	FL
SHL13-17	Beef	1/2b,3b,7	lineageⅠ	2013	FL
SHL13-21	Chicken	1/2b,3b,7	lineageⅠ	2013	FL
SHL13-22	Chicken	1/2b,3b,7	lineageⅠ	2013	FL
SHL13-23	Chicken	1/2b,3b,7	lineageⅠ	2013	FL
SHL13-33	Chicken	1/2b,3b,7	lineageⅠ	2013	FL
SHL13-34	Chicken	1/2b,3b,7	lineageⅠ	2013	FL
SHL13-35	Duck	1/2b,3b,7	lineageⅠ	2013	FL
SHL13-36	Duck	1/2b,3b,7	lineageⅠ	2013	FL
SHL13-37	Duck	1/2b,3b,7	lineageⅠ	2013	FL
SHL002	Human(blood)	1/2b	lineageⅠ	2007	FL
SHL003	Human(blood)	1/2b	lineageⅠ	2008	FL
SHL007	Human(blood)	1/2b	lineageⅠ	2011	FL
SHL008	Human(blood)	1/2b	lineageⅠ	2012	FL
SHL010	Human(blood)	1/2b	lineageⅠ	2012	FL
SHL012	Human(CSF)	1/2b	lineageⅠ	2010	FL
SHL12-1	Pork	1/2c,3c	lineageⅡ	2012	Mutation type 19 (aa 326)
SHL12-2	Pork	1/2c,3c	lineageⅡ	2012	Mutation type 8 (aa 460)
SHL12-3	Beef	1/2c,3c	lineageⅡ	2012	Mutation type 8 (aa 460)
SHL12-7	Beef	1/2c,3c	lineageⅡ	2012	Mutation type 4 (aa 9)
SHL12-8	Beef	1/2c,3c	lineageⅡ	2012	Mutation type 12 (aa 577)
SHL12-10	Chicken	1/2c,3c	lineageⅡ	2012	Mutation type 19 (aa 326)
SHL12-17	Pork	1/2c,3c	lineageⅡ	2012	Mutation type 11 (aa 685)
SHL12-24	Pork	1/2c,3c	lineageⅡ	2012	Mutation type 12 (aa 578)
SHL12-25	Duck	1/2c,3c	lineageⅡ	2012	Mutation type 4 (aa 9)
SHL12-28	Duck	1/2c,3c	lineageⅡ	2012	Mutation type 4 (aa 9)
SHL12-32	Chicken	1/2c,3c	lineageⅡ	2012	Mutation type 4 (aa 9)
SHL12-33	Chicken	1/2c,3c	lineageⅡ	2012	Mutation type 19 (aa 326)
SHL12-47	Beef	1/2c,3c	lineageⅡ	2012	Mutation type 4 (aa 9)
SHL12-48	Pork	1/2c,3c	lineageⅡ	2012	Mutation type 11 (aa 685)
SHL12-55	Pork	1/2c,3c	lineageⅡ	2012	Mutation type 8 (aa 460)
SHL12-56	Pork	1/2c,3c	lineageⅡ	2012	Mutation type 11 (aa 485)
SHL12-57	Pork	1/2c,3c	lineageⅡ	2012	Mutation type 4 (aa 9)
SHL12-59	Beef	1/2c,3c	lineageⅡ	2012	Mutation type 11 (aa 685)
SHL12-60	Chicken	1/2c,3c	lineageⅡ	2012	Mutation type 4 (aa 9)
SHL12-62	Chicken	1/2c,3c	lineageⅡ	2012	Mutation type 4 (aa 9)
SHL12-64	Pork	1/2c,3c	lineageⅡ	2012	Mutation type 11 (aa 685)
SHL12-66	Chicken	1/2c,3c	lineageⅡ	2012	Mutation type 4 (aa 9)
SHL12-67	Duck	1/2c,3c	lineageⅡ	2012	Mutation type 4 (aa 9)
SHL12-68	Duck	1/2c,3c	lineageⅡ	2012	Mutation type 8 (aa 460)
SHL12-70	Pork	1/2c,3c	lineageⅡ	2012	Mutation type 8 (aa 460)
SHL12-71	Beef	1/2c,3c	lineageⅡ	2012	Mutation type 19 (aa 326)
SHL13-4	Duck	1/2c,3c	lineageⅡ	2013	FL
SHL13-5	Beef	1/2c,3c	lineageⅡ	2013	Mutation type 8 (aa 460)
SHL13-6	Beef	1/2c,3c	lineageⅡ	2013	Mutation type 4 (aa 9)
SHL13-8	Duck	1/2c,3c	lineageⅡ	2013	Mutation type 4 (aa 9)
SHL13-9	Duck	1/2c,3c	lineageⅡ	2013	FL
SHL13-10	Beef	1/2c,3c	lineageⅡ	2013	Mutation type 19 (aa 326)
SHL13-11	Beef	1/2c,3c	lineageⅡ	2013	Mutation type 19 (aa 326)
SHL13-13	Pork	1/2c,3c	lineageⅡ	2013	Mutation type 19 (aa 326)
SHL13-16	Duck	1/2c,3c	lineageⅡ	2013	Mutation type 4 (aa 9)
SHL13-20	Beef	1/2c,3c	lineageⅡ	2013	Mutation type 12 (aa 577)
SHL13-24	Chicken	1/2c,3c	lineageⅡ	2013	Mutation type 4 (aa 9)
SHL13-25	Duck	1/2c,3c	lineageⅡ	2013	Mutation type 4 (aa 9)
SHL13-26	Duck	1/2c,3c	lineageⅡ	2013	Mutation type 4 (aa 9)
SHL13-27	Duck	1/2c,3c	lineageⅡ	2013	FL
SHL13-29	Pork	1/2c,3c	lineageⅡ	2013	Mutation type 4 (aa 9)
SHL13-31	Chicken	1/2c,3c	lineageⅡ	2013	Mutation type 19 (aa 326)
SHL13-32	Chicken	1/2c,3c	lineageⅡ	2013	Mutation type 19 (aa 326)
LM430	Pork	1/2c	lineageⅡ	2008	Mutation type 11 (aa 685)
LM440	Fish	1/2c	lineageⅡ	2008	Mutation type 4 (aa 9)
LM470	Vegetible	1/2c	lineageⅡ	2004	Mutation type 19 (aa 326)
SHL006	Human(blood)	1/2c	lineageⅡ	2010	Mutation type 12 (aa 577)
FL， full-length InlA sequence.

## Sheet: Sheet2
Strain	Source	Serotype	Lineage	Year	InlA phenotype	A7	A6	A2GA4
LM430	Pork	1/2c	lineageⅡ	2008	Mutation type 11 (aa 685)
LM440	Fish	1/2c	lineageⅡ	2008	Mutation type 4 (aa 9)
LM470	Vegetible	1/2c	lineageⅡ	2004	Mutation type 19 (aa 326)
SHL006	Human(blood)	1/2c	lineageⅡ	2010	Mutation type 12 (aa 577)
SHL12-2	Pork	1/2c,3c	lineageⅡ	2012	Mutation type 8 (aa 460)	A7
SHL13-12	Duck	1/2a,3a	lineageⅡ	2013	Mutation type 6 (aa 492)	A7
SHL12-22	Duck	1/2a,3a	lineageⅡ	2012	Mutation type 13 (aa 526),1-codon deletion	A7

## Sheet: Sheet3
	Mutation type 1	Mutation type 2	Mutation type 3	Mutation type 4	Mutation type 5	Mutation type 6	Mutation type 7	Mutation type 8	Mutation type 9	Mutation type 10	Mutation type 11	Mutation type 12	Mutation type 13	Mutation type 14	Mutation type 15	Mutation type 16	Mutation type 17	Mutation type 18	Mutation type 19
Duck				9		4							1
Beef				4		1		2			1	2							3
Pork				2				2			4	2							2
Chicken				5								1							4
Human
Vegetable																			1
Fish				1
Yogurt
